# Supplementary material for: GCI30: a global dataset of 30 m cropping intensity using multisource remote sensing imagery
Source: Copernicus journal article supplement (doi:10.5194/essd-13-4799-2021), 2021-10-21
Supplement: Supplementary file 1 [file essd-13-4799-2021-supplement.pdf]

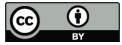

*Supplement of*

## **GCI30: a global dataset of 30 m cropping intensity using multisource remote sensing imagery**

**Miao Zhang et al.**

*Correspondence to:* Bingfang Wu ([wubf@aircas.ac.cn](mailto:wubf@aircas.ac.cn)) and Chong Liu ([liuc@mail.sysu.edu.cn](mailto:liuc@mail.sysu.edu.cn))

The copyright of individual parts of the supplement might differ from the article licence.

**Table S1.** Data sources for generating the global 30-m cropland extent.

| Product name | Description                                                      | Type           | Selected classes         | Definition                                                                                                                                                | Spatial coverage   | Spatial resolution | Epoch used | Website                                                                                                                                                                 |
|--------------|------------------------------------------------------------------|----------------|--------------------------|-----------------------------------------------------------------------------------------------------------------------------------------------------------|--------------------|--------------------|------------|-------------------------------------------------------------------------------------------------------------------------------------------------------------------------|
| FROM-GLC     | Finer resolution observation and monitoring of global land cover | Land cover     | Croplands                | This type includes rice fields, Greenhouse farming, and other arable and tillage land.                                                                    | Global             | 30-m               | 2017       | <a href="http://data.ess.tsinghua.edu.cn/">http://data.ess.tsinghua.edu.cn/</a>                                                                                         |
| GFSAD30      | Global food security support analysis data at 30-m               | Cropland layer | Croplands                | This type includes all agricultural annual standing croplands, cropland fallows, and permanent plantation crops                                           | Global             | 30-m               | 2015       | <a href="https://lpdaac.usgs.gov/tools/data-pool/">https://lpdaac.usgs.gov/tools/data-pool/</a>                                                                         |
| CDL          | USDA NASS cropland data layer                                    | Cropland layer | Cropland                 | Crop-specific land cover type                                                                                                                             | Contiguous U.S.    | 30-m               | 2017       | <a href="https://www.nass.usda.gov/index.php">https://www.nass.usda.gov/index.php</a>                                                                                   |
| AAFC ACI     | Canada AAFC annual crop inventory                                | Cropland layer | Cropland                 | Crop-specific land cover type                                                                                                                             | Canada             | 30-m               | 2017       | <a href="https://www.agr.gc.ca/atlas/aci/">https://www.agr.gc.ca/atlas/aci/</a>                                                                                         |
| ChinaCover   | China 30m cropland extent                                        | Land cover     | Croplands                | This type includes two sub-classes, paddy fields and dry farmland.                                                                                        | China              | 30-m               | 2010       | <a href="http://www.geodata.cn/data/datadetails.html?dataguid=1471197&amp;docId=12230">http://www.geodata.cn/data/datadetails.html?dataguid=1471197&amp;docId=12230</a> |
| SERVIR       | Regional land cover monitoring system for the Lower Mekong       | Land cover     | Cropland, & Rice paddies | Cropland includes lands with herbaceous and shrubby crops followed by harvest and a bare soil period. This category includes single, mixed, multiple, and | Lower Mekong basin | 30-m               | 2018       | <a href="https://servir.adpc.net/">https://servir.adpc.net/</a>                                                                                                         |

|            |                                                          |            |                                |                                                                                                                                                                                                                                                                      |           |      |      |                                                                                   |
|------------|----------------------------------------------------------|------------|--------------------------------|----------------------------------------------------------------------------------------------------------------------------------------------------------------------------------------------------------------------------------------------------------------------|-----------|------|------|-----------------------------------------------------------------------------------|
|            |                                                          |            |                                | seasonal cropping systems. Tea and coffee plantations are included in this layer; but orchards, forest croplands, and forest plantations are not. Rice paddies include irrigated or flooded rice fields and low land paddy fields where rice is intensively planted. |           |      |      |                                                                                   |
| NLCD       | USGS national land cover database                        | Land cover | Cultivated crops               | Areas used for the production of annual crops, such as corn, soybeans, vegetables, tobacco, and cotton, and also perennial woody crops such as orchards and vineyards. This class also includes all land being actively tilled.                                      | U.S.      | 30-m | 2016 | <a href="https://www.mrlc.gov/">https://www.mrlc.gov/</a>                         |
| MapBiomass | Brazilian annual land use and land cover mapping project | Land cover | Agriculture                    | This class includes both temporary crop, and perennial crop.                                                                                                                                                                                                         | Brazil    | 30-m | 2018 | <a href="https://mapbiomas.org/en/products">https://mapbiomas.org/en/products</a> |
| CLUM       | Catchment scale land use of Australia                    | Land cover | Cropping, & irrigated cropping | This category includes both rainfed and                                                                                                                                                                                                                              | Australia | 50-m | 2018 | <a href="https://www.agriculture.gov.au/">https://www.agriculture.gov.au/</a>     |

|      |                                    |                |           |                                                                                                                             |           |      |           |                                                                               |
|------|------------------------------------|----------------|-----------|-----------------------------------------------------------------------------------------------------------------------------|-----------|------|-----------|-------------------------------------------------------------------------------|
|      |                                    |                |           | irrigated cereals, beverage and spice crops, hay and silage, sugar, cotton, pulses, rice etc.                               |           |      |           |                                                                               |
| INTA | National cropland map of Argentina | Cropland layer | Croplands | This class includes fields used for cultivation of summer crops, winter crops, and sugarcane. Fallow land is also included. | Argentina | 30-m | 2018-2019 | <a href="http://www.geointa.inta.gob.ar/">http://www.geointa.inta.gob.ar/</a> |

**Table S2.** Meta information of global agro-ecological zones.

| Full name                                 | Code ID | Cropland percentage (%) | Category |
|-------------------------------------------|---------|-------------------------|----------|
| Equatorial central Africa                 | C01     | 2.72                    | VL       |
| East African highlands                    | C02     | 12.88                   | L        |
| Gulf of Guinea                            | C03     | 17.35                   | M        |
| Horn of Africa                            | C04     | 4.72                    | L        |
| Madagascar(main)                          | C05     | 2.4                     | VL       |
| SW Madagascar                             | C06     | 1.32                    | VL       |
| North Africa Mediterranean                | C07     | 15.26                   | M        |
| Sahel                                     | C08     | 6.95                    | L        |
| Southern Africa                           | C09     | 3.41                    | VL       |
| S. Africa Western Cape                    | C10     | 18.42                   | M        |
| British Columbia To Colorado              | C11     | 5.45                    | L        |
| America northern great plains             | C12     | 64.5                    | H        |
| America corn belt                         | C13     | 27.71                   | M        |
| America cotton belt-Mexican coastal plain | C14     | 18.34                   | M        |
| Sub-boreal North America                  | C15     | 5.67                    | L        |
| America West Coast                        | C16     | 14.27                   | L        |
| Sierra Madre                              | C17     | 5.42                    | L        |
| SW Mexico and N. Mexico highlands         | C18     | 5.62                    | L        |
| Northern South and Central America        | C19     | 13.83                   | L        |
| Caribbean                                 | C20     | 27.76                   | M        |
| Central-Northern Andes                    | C21     | 2.57                    | VL       |
| Brazil Nordeste                           | C22     | 10.5                    | L        |
| Central-Eastern Brazil                    | C23     | 12.71                   | L        |
| Amazon                                    | C24     | 1.19                    | VL       |
| Central-North Argentina                   | C25     | 13.62                   | L        |
| SE Brazil-Concepcion-Bahia Blanca         | C26     | 40.35                   | H        |
| SW Southern Cone                          | C27     | 3.06                    | VL       |
| Semi-arid Southern Cone                   | C28     | 3.4                     | VL       |
| Caucasus                                  | C29     | 28.38                   | M        |
| Central Asia Pamir mountains              | C30     | 16.79                   | M        |
| Western Asia                              | C31     | 12.53                   | L        |
| China Gansu-Xinjiang                      | C32     | 10.09                   | L        |
| China Hainan                              | C33     | 35.77                   | M        |
| China Huang Huaihai                       | C34     | 95.27                   | H        |
| China Inner Mongolia                      | C35     | 24.27                   | M        |
| China Loess region                        | C36     | 46.44                   | H        |
| China Lower Yangtze                       | C37     | 40.97                   | H        |
| North East China                          | C38     | 44.1                    | H        |
| China Qinghai-Tibet                       | C39     | 1.21                    | VL       |
| Southern China                            | C40     | 20.16                   | M        |
| South-West China                          | C41     | 25.85                   | M        |
| Taiwan                                    | C42     | 19.37                   | M        |
| East Asia                                 | C43     | 14.24                   | L        |
| Southern Himalayas                        | C44     | 43.26                   | H        |
| Southern Asia                             | C45     | 71.36                   | H        |
| Southern Japan and Korea                  | C46     | 11.32                   | L        |
| Mongolia region                           | C47     | 0.4                     | VL       |
| S. Asia Punjab to Gujarat                 | C48     | 64.98                   | H        |

|                                  |     |       |    |
|----------------------------------|-----|-------|----|
| SE Asia islands                  | C49 | 9.4   | L  |
| SE Asia mainland                 | C50 | 37.06 | M  |
| Eastern Siberia                  | C51 | 0.13  | VL |
| Eastern Central Asia             | C52 | 3.71  | VL |
| North Australia                  | C53 | 3.86  | VL |
| Australia Queensland to Victoria | C54 | 24.14 | M  |
| Australia Nullarbor-Darling      | C55 | 48.92 | H  |
| New Zealand                      | C56 | 4     | L  |
| Boreal Eurasia                   | C57 | 1.14  | VL |
| Ukraine to URAL Mountains        | C58 | 51.75 | H  |
| Mediterranean Europe and Turkey  | C59 | 26.7  | M  |
| W. Europe(non-Mediterranean)     | C60 | 50.57 | H  |
| Boreal North America             | C61 | 0.33  | VL |
| URAL to Altai Mountains          | C62 | 32.93 | M  |
| Australian Desert                | C63 | 0.28  | VL |
| Old World Deserts                | C64 | 0.63  | VL |
| Sub Arctic America               | C65 | 0     | VL |

**Table S3. Meta information of PhenoCam sites used in this study.**

| Site ID                 | Latitude | Longitude | Elevation (m) | Data start date | Data last date |
|-------------------------|----------|-----------|---------------|-----------------|----------------|
| arsbrooks10             | 41.9749  | -93.6905  | 312           | 2019-07-10      | 2020-09-27     |
| arsltarmdcr             | 39.0587  | -75.8513  | 17            | 2017-05-10      | 2020-09-26     |
| arsltarucbec1           | 40.7537  | -78.0057  | 400           | 2019-05-16      | 2020-09-26     |
| arsmnswanlake1          | 45.6845  | -95.7997  | 370           | 2015-10-02      | 2020-09-27     |
| arsmorris1              | 45.6167  | -96.1269  | 341           | 2017-07-25      | 2020-09-20     |
| arsope3ltar             | 39.0309  | -76.8442  | 41            | 2017-04-10      | 2020-09-26     |
| ashbottoms              | 38.8668  | -96.9028  | 374           | 2015-08-18      | 2017-01-15     |
| bouldincorn             | 38.109   | -121.535  | 10            | 2017-07-12      | 2020-09-23     |
| burdetterice1           | 35.8284  | -89.9879  | 10            | 2019-07-23      | 2020-09-27     |
| burdettericea           | 35.8089  | -90.0327  | -5            | 2015-06-18      | 2017-05-22     |
| burdettericec           | 35.8089  | -90.0284  | 70            | 2015-07-02      | 2017-05-22     |
| cafboynorthltar01       | 46.7551  | -117.1261 | 73            | 2017-09-14      | 2020-09-26     |
| cafcookeastltar01       | 46.7815  | -117.0821 | 70            | 2017-05-09      | 2020-09-26     |
| cafcookwestltar01       | 46.784   | -117.0908 | 795           | 2017-06-26      | 2020-09-26     |
| goodwater               | 39.2285  | -92.1194  | 794           | 2015-09-25      | 2020-09-27     |
| goodwaterbau            | 39.2312  | -92.1522  | 807           | 2018-06-06      | 2020-09-27     |
| hawbeckerddy            | 40.6608  | -77.8488  | 264           | 2015-09-24      | 2018-04-24     |
| humnokericea            | 34.5852  | -91.7517  | 274           | 2015-06-24      | 2020-09-27     |
| humnokericec            | 34.5889  | -91.7517  | 310           | 2015-06-24      | 2020-09-27     |
| jurong                  | 31.8068  | 119.2173  | 61            | 2017-10-21      | 2020-09-27     |
| kelloggcorn             | 42.4375  | -85.3225  | 70            | 2014-05-24      | 2019-11-18     |
| keplerltar              | 40.7231  | -77.9245  | 15            | 2018-04-25      | 2019-05-15     |
| mandanh5                | 46.7754  | -100.9511 | 288           | 2015-09-16      | 2020-09-26     |
| mandani2                | 46.7614  | -100.9257 | 378           | 2016-04-22      | 2020-09-26     |
| manilacotton            | 35.8872  | -90.1371  | 593           | 2016-06-05      | 2020-09-26     |
| mead1                   | 41.1651  | -96.4766  | 590           | 2016-07-12      | 2020-09-27     |
| mead3                   | 41.1797  | -96.4397  | 73            | 2016-07-12      | 2020-09-27     |
| NEON.D06.KONA.DP1.00033 | 39.1104  | -96.6129  | 361           | 2016-05-06      | 2020-09-27     |
| NEON.D10.STER.DP1.00033 | 40.4619  | -103.0293 | 363           | 2016-12-18      | 2020-09-27     |
| rosemountc6             | 44.7288  | -93.0888  | 443           | 2015-10-22      | 2017-01-01     |
| rosemountcons           | 44.6946  | -93.0578  | 1366          | 2017-01-09      | 2020-09-27     |
| rosemountconv           | 44.691   | -93.0576  | 288           | 2017-01-13      | 2020-09-27     |
| rosemountg21            | 44.7143  | -93.0898  | 283           | 2015-10-26      | 2017-01-01     |
| shangqiu                | 34.5155  | 115.595   | 283           | 2018-01-24      | 2020-09-27     |
| silverton               | 44.9986  | -122.6948 | 290           | 2013-07-22      | 2020-09-26     |
| slovenia3moskanjci      | 46.4098  | 15.9963   | 55            | 2019-04-03      | 2020-09-27     |
| southerngreatplains     | 36.6058  | -97.4888  | 16            | 2012-05-16      | 2020-09-26     |
| uiefmaize2              | 40.0628  | -88.1961  | 224           | 2018-08-08      | 2020-09-26     |
| uiefsorghum             | 40.0065  | -88.2032  | 224           | 2018-08-15      | 2020-07-10     |
| usof6                   | 35.7333  | -90.0403  | 70            | 2018-05-18      | 2020-09-27     |

**Table S4. Cropping intensity estimated by five different products at country/region level.**

| Index | Country/region name*     | GCI30 | MCD12Q2 | VIP4 | Ray and Foley | SACRA |
|-------|--------------------------|-------|---------|------|---------------|-------|
| 1     | Afghanistan              | 1.00  | 1.10    | 1.10 | 0.40          | 0.99  |
| 2     | Albania                  | 1.19  | 1.03    | 1.36 | 0.66          | 0.99  |
| 3     | Algeria                  | 0.78  | 0.96    | 1.08 | 0.52          | 0.88  |
| 4     | Angola                   | 0.91  | 0.93    | n.a. | 0.83          | 0.85  |
| 5     | Antigua and Barbuda      | 1.00  | 0.67    | n.a. | n.a.          | n.a.  |
| 6     | Argentina                | 0.98  | 1.12    | 1.16 | 1.02          | 1.13  |
| 7     | Armenia                  | 1.00  | 1.00    | 1.01 | 0.96          | 1.46  |
| 8     | Australia                | 0.77  | 0.96    | 1.15 | 0.52          | 0.98  |
| 9     | Austria                  | 1.17  | 1.02    | 1.01 | 0.99          | 0.87  |
| 10    | Azerbaijan               | 1.05  | 0.99    | 1.34 | 0.66          | 1.39  |
| 11    | Bahamas                  | 0.94  | 0.67    | n.a. | n.a.          | 0.77  |
| 12    | Bahrain                  | 1.00  | n.a.    | n.a. | 0.78          | n.a.  |
| 13    | Bangladesh               | 1.56  | 1.10    | 1.58 | 1.67          | 1.70  |
| 14    | Barbados                 | 0.95  | 0.83    | n.a. | n.a.          | n.a.  |
| 15    | Belgium                  | 1.22  | 0.99    | 1.03 | 1.20          | 0.81  |
| 16    | Belize                   | 1.24  | 1.36    | n.a. | 0.79          | 0.96  |
| 17    | Benin                    | 1.05  | 0.94    | 1.25 | 0.87          | 1.37  |
| 18    | Bhutan                   | 1.04  | 0.96    | 1.50 | 0.85          | 0.86  |
| 19    | Bolivia                  | 1.21  | 1.21    | n.a. | 0.74          | 0.97  |
| 20    | Bosnia and Herzegovina   | 1.03  | 1.00    | 1.00 | n.a.          | 0.78  |
| 21    | Botswana                 | 0.76  | 1.00    | n.a. | 0.62          | 0.89  |
| 22    | Brazil                   | 1.31  | 1.31    | 1.21 | 0.82          | 1.06  |
| 23    | Brunei                   | 1.20  | 1.83    | n.a. | 2.30          | 0.86  |
| 24    | Bulgaria                 | 0.98  | 1.02    | 1.01 | 0.89          | 1.02  |
| 25    | Burkina Faso             | 1.00  | 0.98    | n.a. | 1.04          | 0.98  |
| 26    | Burundi                  | 1.03  | 0.98    | n.a. | 0.89          | 1.24  |
| 27    | Byelarus                 | 1.14  | 1.03    | 1.00 | 0.73          | 0.93  |
| 28    | Cambodia                 | 1.12  | 1.00    | 1.09 | 0.76          | 1.38  |
| 29    | Cameroon                 | 1.00  | 0.95    | 1.29 | 0.64          | 1.36  |
| 30    | Canada                   | 0.99  | 1.00    | 1.01 | 0.52          | 0.96  |
| 31    | Central African Republic | 1.08  | 1.00    | 1.00 | 0.45          | 0.69  |
| 32    | Chad                     | 1.00  | 0.95    | n.a. | 0.82          | 0.85  |
| 33    | Chile                    | 0.89  | 1.00    | 1.13 | 0.77          | 0.72  |
| 34    | China                    | 1.12  | 1.09    | 1.28 | 1.29          | 1.12  |
| 35    | Colombia                 | 1.07  | 0.84    | 1.00 | 1.04          | 1.17  |
| 36    | Congo                    | 1.04  | 0.65    | 1.08 | 0.54          | 1.22  |
| 37    | Costa Rica               | 0.97  | 1.08    | n.a. | 0.99          | 1.01  |
| 38    | Croatia                  | 1.03  | 1.00    | 1.00 | n.a.          | 0.85  |
| 39    | Cuba                     | 1.03  | 0.98    | 1.00 | 0.46          | 0.67  |
| 40    | Cyprus                   | 0.89  | 1.00    | n.a. | 0.80          | 0.98  |
| 41    | Czech Republic           | 1.16  | 1.07    | 1.01 | 0.78          | 1.02  |



|    |                    |      |      |      |      |      |
|----|--------------------|------|------|------|------|------|
| 42 | Denmark            | 1.20 | 1.09 | 1.24 | 1.08 | 1.62 |
| 43 | Djibouti           | 0.76 | n.a. | n.a. | n.a. | 1.17 |
| 44 | Dominica           | 1.33 | n.a. | n.a. | n.a. | n.a. |
| 45 | Dominican Republic | 1.37 | 1.04 | n.a. | 0.68 | 0.97 |
| 46 | Ecuador            | 1.03 | 0.92 | n.a. | 0.96 | 1.57 |
| 47 | Egypt              | 1.44 | 1.55 | 1.96 | 1.75 | 0.99 |
| 48 | El Salvador        | 0.98 | 1.02 | 1.00 | 0.80 | 1.01 |
| 49 | Equatorial Guinea  | 1.30 | n.a. | 1.52 | 0.45 | 1.89 |
| 50 | Eritrea            | 0.89 | 0.99 | n.a. | 0.95 | 0.96 |
| 51 | Estonia            | 1.05 | 1.01 | 1.00 | 0.68 | 1.00 |
| 52 | Ethiopia           | 1.02 | 0.98 | 1.52 | 0.99 | 1.43 |
| 53 | Finland            | 1.00 | 1.00 | 1.01 | 0.60 | 1.00 |
| 54 | France             | 1.02 | 0.96 | 1.05 | 0.85 | 1.23 |
| 55 | Gabon              | 1.32 | 0.55 | 1.44 | 0.46 | 1.86 |
| 56 | Gambia, The        | 0.99 | 0.97 | n.a. | 1.03 | 1.00 |
| 57 | Gaza Strip         | 0.69 | 0.95 | n.a. | n.a. | 1.00 |
| 58 | Georgia            | 1.01 | 1.00 | 1.16 | 0.77 | 0.95 |
| 59 | Germany            | 1.17 | 1.04 | 1.17 | 1.66 | 1.10 |
| 60 | Ghana              | 1.11 | 0.90 | 1.26 | 0.90 | 1.54 |
| 61 | Greece             | 1.01 | 0.97 | 1.19 | 0.91 | 1.09 |
| 62 | Grenada            | 1.33 | 0.67 | n.a. | n.a. | n.a. |
| 63 | Guadeloupe         | 1.06 | 0.76 | n.a. | n.a. | n.a. |
| 64 | Guatemala          | 1.00 | 0.96 | 1.17 | 0.83 | 0.81 |
| 65 | Guinea             | 1.00 | 0.97 | n.a. | 0.92 | 1.04 |
| 66 | Guinea-Bissau      | 0.92 | 0.87 | n.a. | 0.14 | 0.93 |
| 67 | Guyana             | 1.74 | 1.24 | 2.33 | 0.46 | 0.82 |
| 68 | Haiti              | 1.46 | 0.91 | n.a. | 0.97 | 0.83 |
| 69 | Honduras           | 1.04 | 1.00 | n.a. | 0.72 | 0.90 |
| 70 | Hungary            | 1.05 | 1.03 | 1.03 | 1.03 | 0.95 |
| 71 | India              | 1.20 | 1.19 | 1.29 | 1.14 | 1.43 |
| 72 | Indonesia          | 1.32 | 1.03 | 1.11 | 0.90 | 1.14 |
| 73 | Iran               | 0.85 | 1.03 | 1.11 | 0.76 | 1.05 |
| 74 | Iraq               | 0.72 | 0.91 | 1.09 | 0.75 | 1.14 |
| 75 | Ireland            | 1.07 | 1.01 | 1.00 | 0.31 | 1.45 |
| 76 | Israel             | 0.92 | 1.01 | 1.00 | 0.72 | 0.99 |
| 77 | Italy              | 1.02 | 1.01 | 1.05 | 0.96 | 1.04 |
| 78 | Ivory Coast        | 1.23 | 0.70 | 1.18 | 0.97 | 1.68 |
| 79 | Jamaica            | 1.06 | 1.19 | n.a. | 0.69 | 0.67 |
| 80 | Japan              | 1.02 | 0.99 | 1.00 | 0.79 | 0.79 |
| 81 | Jersey             | 1.19 | 0.91 | n.a. | n.a. | n.a. |
| 82 | Jordan             | 0.85 | 0.93 | 1.00 | 0.73 | 0.57 |
| 83 | Kazakhstan         | 0.93 | 0.97 | 1.03 | 0.69 | 1.01 |
| 84 | Kenya              | 1.03 | 1.02 | 1.97 | 0.82 | 1.82 |

|     |                  |      |      |      |      |      |
|-----|------------------|------|------|------|------|------|
| 85  | Kuwait           | 1.20 | 1.14 | 1.00 | 0.81 | 0.56 |
| 86  | Kyrgyzstan       | 1.00 | 1.00 | 1.00 | 0.70 | 1.06 |
| 87  | Laos             | 1.03 | 0.95 | 1.06 | 1.01 | 1.23 |
| 88  | Latvia           | 1.07 | 1.03 | 1.01 | 0.58 | 0.97 |
| 89  | Lebanon          | 0.97 | 0.96 | 1.29 | 0.96 | 1.11 |
| 90  | Lesotho          | 0.98 | 0.99 | 1.00 | 0.70 | 0.83 |
| 91  | Liberia          | 1.32 | 0.81 | 1.72 | 0.86 | 1.47 |
| 92  | Libya            | 0.53 | 0.85 | n.a. | 0.38 | 0.17 |
| 93  | Liechtenstein    | 1.12 | n.a. | 1.00 | n.a. | 0.33 |
| 94  | Lithuania        | 1.12 | 1.04 | 1.01 | 0.77 | 0.98 |
| 95  | Luxembourg       | 1.19 | 1.00 | 1.07 | n.a. | 1.18 |
| 96  | Macedonia        | 0.98 | 1.00 | 1.04 | n.a. | 0.99 |
| 97  | Madagascar       | 0.98 | 1.04 | n.a. | 0.84 | 0.82 |
| 98  | Malawi           | 0.95 | 1.00 | 1.13 | 1.03 | 0.86 |
| 99  | Malaysia         | 1.23 | 1.35 | 1.00 | 0.80 | 0.93 |
| 100 | Mali             | 0.97 | 0.99 | n.a. | 0.83 | 0.94 |
| 101 | Malta            | 0.99 | 1.04 | n.a. | n.a. | n.a. |
| 102 | Man, Isle of     | 1.13 | 1.10 | n.a. | n.a. | 0.75 |
| 103 | Martinique       | 1.07 | 0.65 | n.a. | n.a. | n.a. |
| 104 | Mauritania       | 1.04 | 1.27 | n.a. | 0.81 | 0.86 |
| 105 | Mexico           | 1.01 | 1.01 | 1.15 | 0.62 | 0.90 |
| 106 | Moldova          | 1.04 | 1.01 | 1.01 | 0.79 | 0.99 |
| 107 | Mongolia         | 0.88 | 1.00 | 1.00 | 0.32 | 0.99 |
| 108 | Montenegro       | 1.23 | 1.06 | 1.00 | n.a. | 0.94 |
| 109 | Montserrat       | 1.00 | 0.74 | n.a. | n.a. | n.a. |
| 110 | Morocco          | 0.73 | 0.88 | 1.07 | 0.79 | 0.92 |
| 111 | Mozambique       | 0.90 | 0.97 | 1.02 | 0.97 | 0.70 |
| 112 | Myanmar (Burma)  | 1.08 | 1.07 | 1.25 | 1.45 | 1.46 |
| 113 | Namibia          | 0.76 | 0.90 | n.a. | 0.43 | 0.91 |
| 114 | Nepal            | 1.20 | 1.15 | n.a. | 1.91 | 1.32 |
| 115 | Netherlands      | 1.11 | 0.98 | 1.03 | 1.21 | 0.87 |
| 116 | New Zealand      | 1.14 | 1.14 | n.a. | 0.88 | 1.05 |
| 117 | Nicaragua        | 1.01 | 1.10 | n.a. | 0.46 | 0.97 |
| 118 | Niger            | 1.00 | 0.73 | n.a. | 0.94 | 0.55 |
| 119 | Nigeria          | 1.02 | 0.91 | 1.31 | 1.16 | 1.35 |
| 120 | North Korea      | 1.00 | 1.00 | 1.00 | 1.09 | 0.92 |
| 121 | Norway           | 1.03 | 1.00 | 1.00 | 0.43 | 0.95 |
| 122 | Oman             | 1.01 | 1.00 | n.a. | 0.93 | 0.19 |
| 123 | Pakistan         | 1.36 | 1.47 | 1.74 | 0.94 | 1.57 |
| 124 | Panama           | 1.11 | 1.02 | n.a. | 0.46 | 1.21 |
| 125 | Papua New Guinea | 1.05 | 0.82 | n.a. | 1.08 | 0.99 |
| 126 | Paraguay         | 1.72 | 1.47 | 1.49 | 1.75 | 1.01 |
| 127 | Peru             | 0.80 | 1.02 | 1.00 | 0.70 | 1.16 |

|     |                              |      |      |      |      |      |
|-----|------------------------------|------|------|------|------|------|
| 128 | Philippines                  | 1.46 | 1.09 | 1.55 | 1.32 | 1.08 |
| 129 | Poland                       | 1.15 | 1.03 | 1.05 | 0.93 | 1.05 |
| 130 | Portugal                     | 0.94 | 1.02 | 1.15 | 0.92 | 0.91 |
| 131 | Puerto Rico                  | 1.13 | 1.07 | n.a. | 0.50 | 0.42 |
| 132 | Qatar                        | 1.04 | 1.50 | n.a. | n.a. | n.a. |
| 133 | Romania                      | 1.02 | 1.02 | 1.03 | 0.99 | 0.81 |
| 134 | Russia                       | 0.97 | 0.99 | 1.03 | 0.45 | 1.03 |
| 135 | Rwanda                       | 1.36 | 1.17 | n.a. | 1.28 | 1.83 |
| 136 | San Marino                   | 1.03 | 1.00 | 1.00 | n.a. | n.a. |
| 137 | Saudi Arabia                 | 0.86 | 0.90 | n.a. | 0.29 | 0.59 |
| 138 | Senegal                      | 1.00 | 0.98 | n.a. | 0.74 | 1.00 |
| 139 | Serbia                       | 1.01 | 1.00 | 1.00 | n.a. | 0.90 |
| 140 | Sierra Leone                 | 1.20 | 0.94 | n.a. | 0.88 | 1.60 |
| 141 | Slovakia                     | 1.11 | 1.07 | 1.01 | 0.90 | 0.94 |
| 142 | Slovenia                     | 1.14 | 1.00 | 1.00 | n.a. | 0.65 |
| 143 | Solomon Islands              | 1.22 | 0.52 | n.a. | n.a. | 1.74 |
| 144 | Somalia                      | 0.85 | 1.14 | 2.04 | 0.69 | 1.85 |
| 145 | South Africa                 | 0.83 | 0.94 | 1.00 | 0.44 | 0.84 |
| 146 | South Korea                  | 1.01 | 1.00 | 1.01 | 1.03 | 0.95 |
| 147 | Spain                        | 0.82 | 0.94 | 1.12 | 0.78 | 1.17 |
| 148 | Sri Lanka                    | 1.39 | 1.24 | 1.29 | 1.04 | 1.13 |
| 149 | St. Kitts and Nevis          | 0.82 | 1.00 | n.a. | n.a. | n.a. |
| 150 | St. Lucia                    | 0.67 | 0.67 | n.a. | n.a. | n.a. |
| 151 | Sudan                        | 0.87 | 0.99 | 1.08 | 0.68 | 0.96 |
| 152 | Suriname                     | 1.70 | 1.70 | n.a. | 0.99 | 0.53 |
| 153 | Swaziland                    | 0.89 | 0.95 | n.a. | 0.80 | 0.96 |
| 154 | Sweden                       | 1.06 | 1.07 | 1.02 | 0.48 | 1.01 |
| 155 | Switzerland                  | 1.24 | 0.97 | 1.00 | 0.71 | 0.75 |
| 156 | Syria                        | 0.79 | 0.86 | 1.10 | 0.85 | 1.14 |
| 157 | Tajikistan                   | 0.94 | 0.99 | 1.01 | 1.09 | 1.06 |
| 158 | Tanzania, United Republic of | 0.84 | 0.98 | 1.05 | 0.92 | 1.20 |
| 159 | Thailand                     | 1.11 | 0.98 | 1.16 | 0.98 | 1.38 |
| 160 | Togo                         | 1.05 | 0.95 | 1.13 | 0.61 | 1.70 |
| 161 | Trinidad and Tobago          | 1.14 | 0.75 | 1.33 | n.a. | 1.33 |
| 162 | Tunisia                      | 0.68 | 0.89 | 1.25 | 0.73 | 0.93 |
| 163 | Turkey                       | 0.90 | 0.97 | 1.15 | 0.80 | 1.08 |
| 164 | Turkmenistan                 | 0.92 | 0.94 | 1.11 | 0.96 | 1.05 |
| 165 | Turks and Caicos Islands     | 1.18 | 0.67 | n.a. | n.a. | n.a. |
| 166 | Uganda                       | 1.30 | 1.01 | 1.02 | 0.86 | 1.40 |
| 167 | Ukraine                      | 1.04 | 1.02 | 1.02 | 0.70 | 0.97 |
| 168 | United Arab Emirates         | 1.05 | 0.71 | n.a. | 1.35 | n.a. |
| 169 | United Kingdom               | 1.02 | 1.01 | 1.12 | 0.76 | 1.46 |
| 170 | United States                | 0.97 | 1.00 | 1.04 | 0.71 | 0.97 |

|     |                |      |      |      |      |      |
|-----|----------------|------|------|------|------|------|
| 171 | Uruguay        | 1.28 | 1.46 | 1.06 | 0.74 | 1.33 |
| 172 | Uzbekistan     | 1.01 | 1.05 | 1.03 | 0.80 | 1.21 |
| 173 | Venezuela      | 0.91 | 0.97 | 1.00 | 0.59 | 0.97 |
| 174 | Vietnam        | 1.58 | 1.27 | 1.25 | 1.39 | 1.31 |
| 175 | West Bank      | 0.93 | 0.98 | 1.00 | n.a. | 0.97 |
| 176 | Western Sahara | 0.55 | n.a. | n.a. | n.a. | n.a. |
| 177 | Yemen          | 1.11 | 1.05 | n.a. | 0.78 | 0.84 |
| 178 | Zaire          | 1.12 | 0.78 | 1.01 | n.a. | 1.01 |
| 179 | Zambia         | 0.90 | 1.13 | 1.10 | 0.48 | 0.94 |
| 180 | Zimbabwe       | 0.93 | 1.01 | 1.00 | 0.74 | 0.84 |

Note:

\* some countries or regions (mostly small islands) are not included in the table because there is no statistical CI value from GCI30 or reference datasets.

n.a. stands for not available.

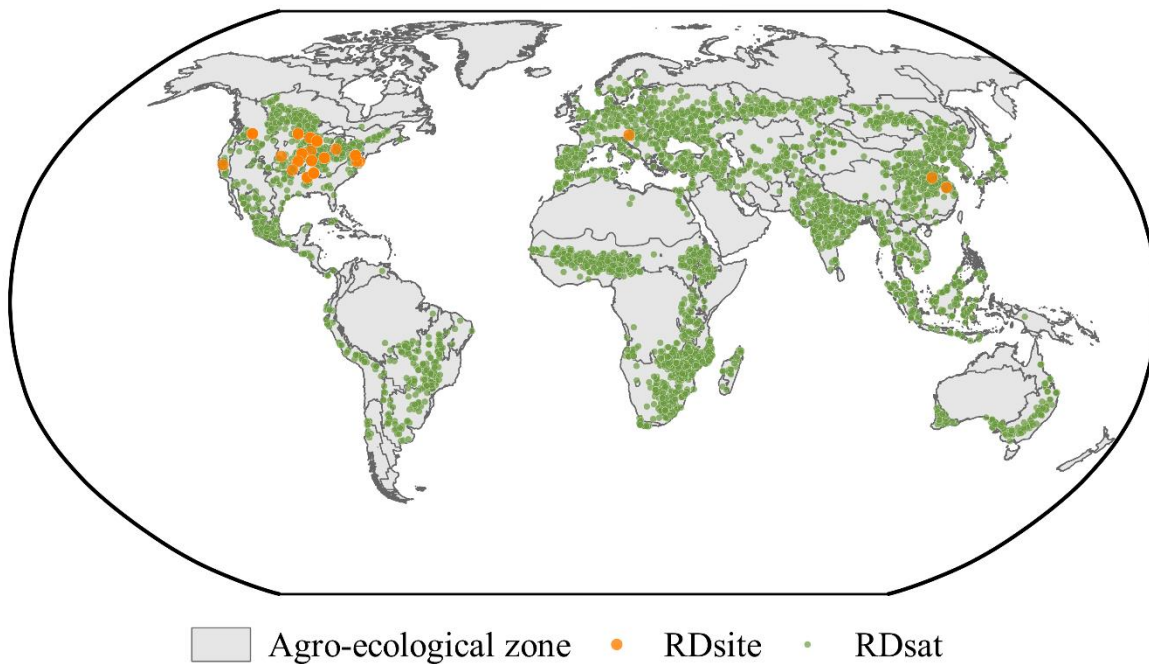

**Figure S1.** Global distribution of Agro-ecological zone (AEZ) boundaries, RDsat and RD site.

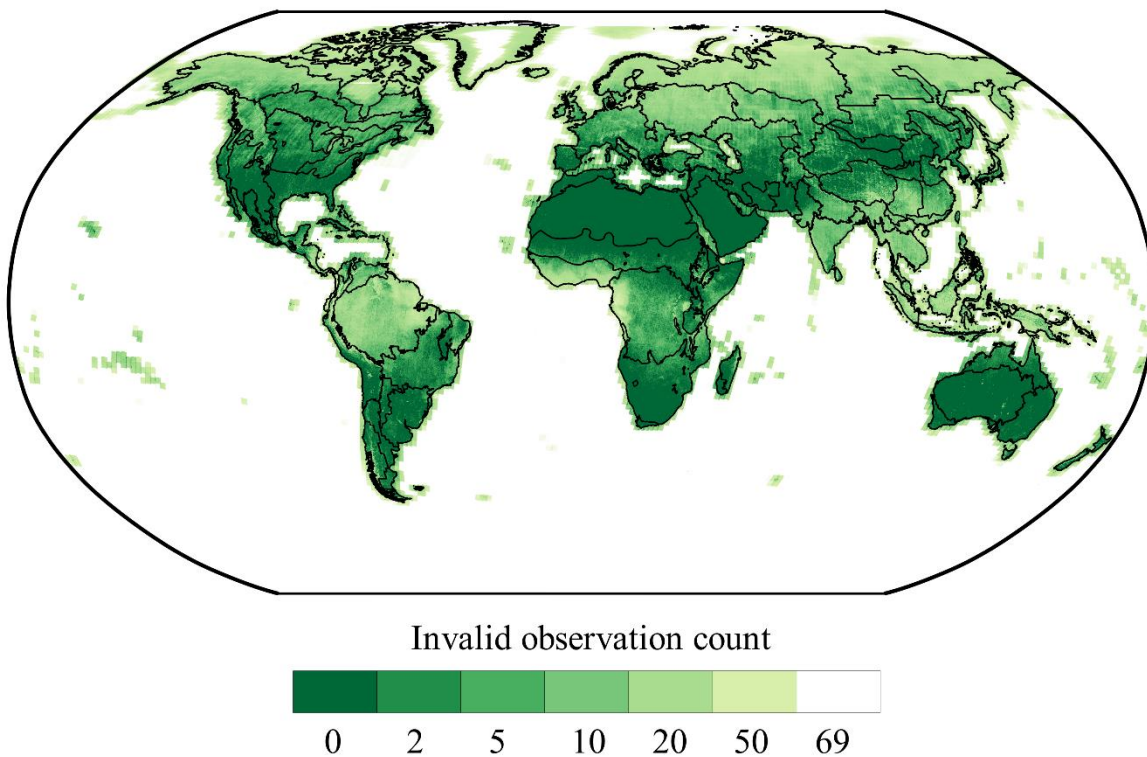

**Figure S2.** Invalid observation count of the 16-day harmonized TOA reflectance composite from 2016 to 2018.

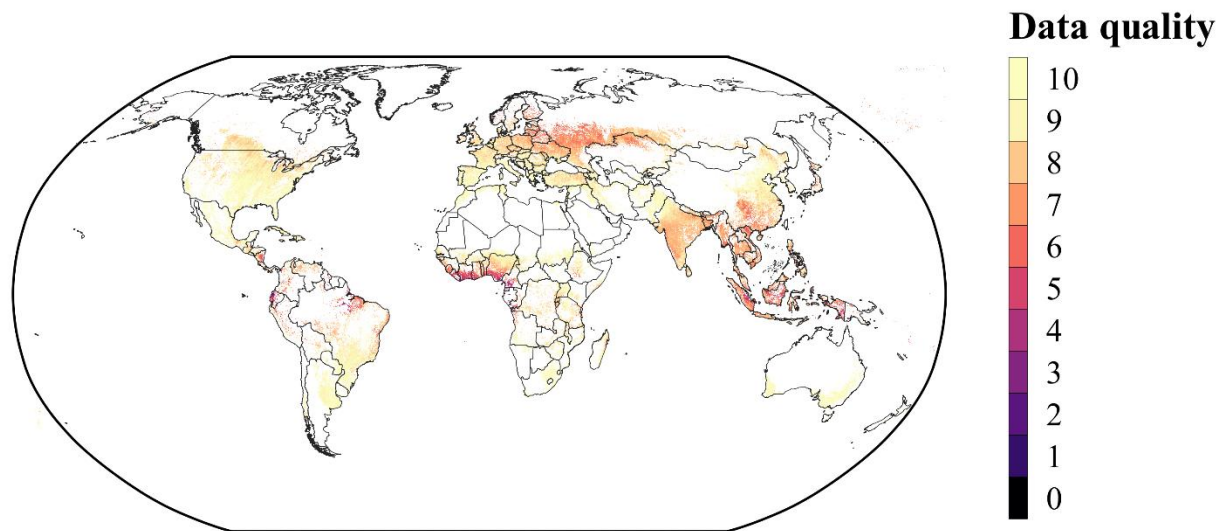

**Figure S3.** Data quality map of GCI30 measured as the invalid number of 16-day composite during 2016-2018. Zero indicates lowest data quality while 10 indicates highest data quality.
